# Supplementary material for: Phenolic compounds, antioxidant activity, antiproliferative activity and bioaccessibility of Sea buckthorn (Hippophaë rhamnoidesL.) berries as affected byin vitrodigestion
Source: Royal Society of Chemistry journal article supplement (doi:10.1039/c7fo00917h), 2017-01-01
Supplement: c7fo00917h1.pdf [file c7fo00917h1.pdf]

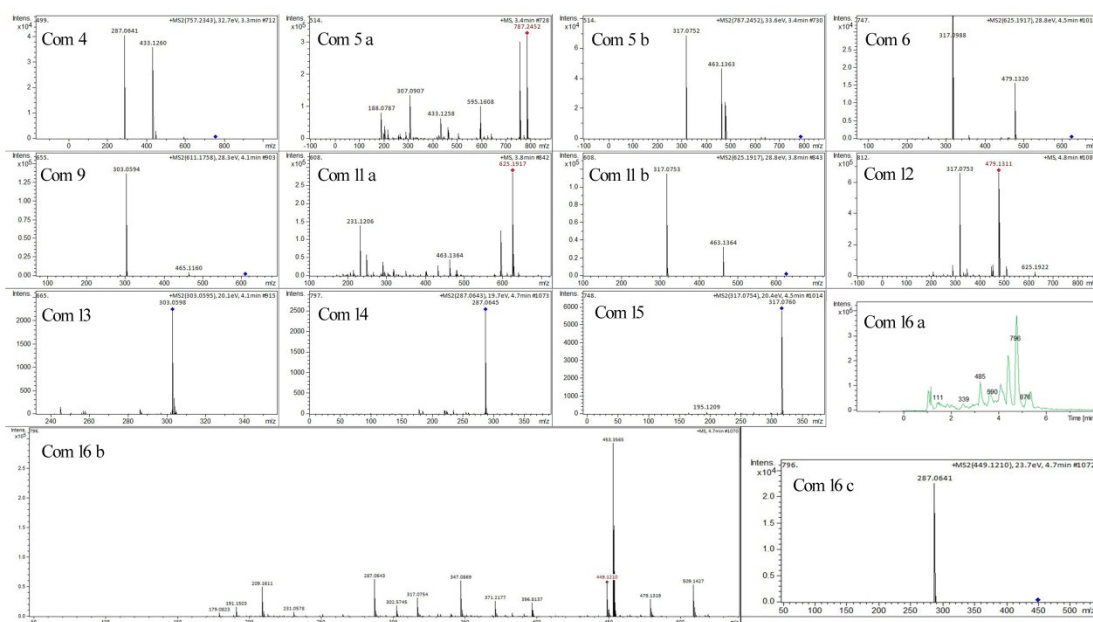

Supplementary Figure S1. Mass-qTOF spectrogram of main phenolics in digested Sea buckthorn berries

Note: Mass-mass identification was carried out using a Bruker Impact II™ UHR-qTOF Mass Spectrometry with a Waters Acquity TUV detector at wavelength of 280 nm. Com 4, 6, 9, 12, 13, 14 and 15 are represented phenolic compounds as: 4: kaempferol-3-sophoroside-7-rhamnoside, 6: isorhamnetin-3-glucoside-7-rhamnoside, 9: quercetin-3-rutinoside, 12: isorhamnetin-3-glucoside, 13: quercetin, 14: kaempferol and 15: isorhamnetin. Com 5 a, 5 b, Com 11 a, and 11 b are the MS and MS2 spectras of isorhamnetin-3-sophoroside-7-rhamnoside and isorhamnetin-3-rutinoside, respectively. And Com 16 a, 16 b and 16 c refer to the number of specific peak, the MS<sup>1</sup> and MS<sup>2</sup> spectra of kaempferol-3-glucoside, separately.
